# Supplementary material for: Patient safety culture in a university hospital emergency department in Switzerland – a survey study
Source: PubMed Central journal article supplement (PMC6446463; doi:10.3205/zma001222), 2019-03-15
Supplement: JME-36-2-14-s-001.pdf [file JME-36-2-14-s-001.pdf]

| <b>Composites and items</b>                                                                                                | Mean % (SD)          | Mean (SD)   |
|----------------------------------------------------------------------------------------------------------------------------|----------------------|-------------|
| <b>Teamwork within units</b>                                                                                               | <b>70.07 (18.24)</b> |             |
| A1: People support one another in this unit.                                                                               | 81.63                | 4.15 (0.71) |
| A3: When a lot of work needs to be done quickly, we work together as a team to get the work done.                          | 81.63                | 3.99 (0.72) |
| A4: In this unit, people treat each other with respect.                                                                    | 73.74                | 3.8 (0.65)  |
| A11: When one area in this unit gets really busy, others help out.                                                         | 43.29                | 3.24 (1.02) |
| <b>Supervisor/Manager expectations &amp; actions promoting patient safety.</b>                                             | <b>67.94 (16.16)</b> |             |
| B1: My supervisor/manager says a good word when he/she sees a job done according to established patient safety procedures. | 54.26                | 3.51 (0.96) |
| B2: My supervisor/manager seriously considers staff suggestions for improving patient safety .                             | 80.85                | 3.88 (0.67) |
| B3: Whenever pressure builds up, my supervisor/manager wants us to work faster, even if it means taking shortcuts.         | 53.68                | 3.38 (0.92) |
| B4: My supervisor/manager overlooks patient safety problems that happen over and over.                                     | 82.98                | 3.95 (0.64) |
| <b>Organizational learning – continuous improvement</b>                                                                    | <b>66.20 (16.54)</b> |             |
| A6: We are actively doing things to improve patient safety.                                                                | 84.69                | 4.00 (0.59) |
| A9: Mistakes have led to positive changes here.                                                                            | 61.11                | 3.60 (0.71) |
| A13: After we make changes to improve patient safety, we evaluate their effectiveness.                                     | 52.81                | 3.54 (0.72) |
| <b>Management support for patient safety</b>                                                                               | <b>60.12 (12.14)</b> |             |
| F1: Hospital management provides a work climate that promotes patient safety.                                              | 62.10                | 3.65 (0.66) |
| F8: The actions of hospital management show that patient safety is a top priority.                                         | 71.15                | 3.36 (0.85) |
| F9: Hospital management seems interested in patient safety only after an adverse event happens.                            | 47.12                | 3.39 (0.89) |
| <b>Overall perceptions of patient safety</b>                                                                               | <b>58.45 (16.54)</b> |             |
| A15: Patient safety is never sacrificed to get more work done.                                                             | 39.18                | 3.19 (0.88) |
| A18: Our procedures and systems are good at preventing errors from happening.                                              | 50.53                | 2.52(0.85)  |
| A10: It is just by chance that more serious mistakes don't happen around here.                                             | 75                   | 3.93 (0.94) |
| A17: We have patient safety problems in this unit.                                                                         | 69.07                | 3.83 (0.70) |
| <b>Feedback &amp; communication about error</b>                                                                            | <b>64.72 (7.42)</b>  |             |
| C1: We are given feedback about changes put into place based on event reports.                                             | 56.52                | 3.55 (1.01) |
| C3: We are informed about errors that happen in this unit.                                                                 | 70.97                | 3.79 (0.72) |
| C5: In this unit, we discuss ways to prevent errors from happening again.                                                  | 66.66                | 3.76 (0.77) |
| <b>Communication openness</b>                                                                                              | <b>61.51 (22.74)</b> |             |
| C2: Staff will freely speak up if they see something that may negatively affect patient care.                              | 69.79                | 3.70 (0.58) |
| C4: Staff feel free to question the decisions or actions of those with more authority.                                     | 35.79                | 3.26 (0.76) |
| C6: Staff are afraid to ask questions when something does not seem right.                                                  | 78.95                | 3.93 (0.73) |
| <b>Frequency of events reported</b>                                                                                        | <b>37.81 (6.90)</b>  |             |
| D1: When a mistake is made, but is caught and corrected before affecting the patient, how often is this reported.          | 36.9                 | 3.14 (0.93) |
| D2: When a mistake is made, but has no potential to harm the patient, how often is this reported.                          | 31.4                 | 3.00 (0.98) |
| D3: When a mistake is made that could harm the patient, but does not, how often is this reported?                          | 45.12                | 3.37 (0.89) |
| <b>Teamwork across units</b>                                                                                               | <b>46.88 (12.39)</b> |             |
| F4: There is good cooperation among hospital units that need to work together.                                             | 44.21                | 3.38 (0.65) |
| F10: Hospital units work well together to provide the best care for patients.                                              | 59.79                | 3.59 (0.66) |
| F2: Hospital units do not coordinate well with each other.                                                                 | 30.93                | 2.99 (0.92) |
| F6: It is often unpleasant to work with staff from other hospital units.                                                   | 52.58                | 3.53 (0.71) |
| <b>Staffing</b>                                                                                                            | <b>62.06 (18.38)</b> |             |
| A2: We have enough staff to handle the workload.                                                                           | 77.78                | 3.99 (0.72) |
| A5: Staff in this unit work longer hours that is best for patient care.                                                    | 59.26                | 3.54 (1.03) |
| A7: We use more agency/temporary staff that is best for patient care.                                                      | 73.96                | 3.91 (0.85) |
| A14: We work in "crisis mode" trying to do too much, too quickly.                                                          | 37.23                | 3.27 (0.82) |
| <b>Handoffs &amp; transitions</b>                                                                                          | <b>47.39 (19.13)</b> |             |

|                                                                                               |              |             |
|-----------------------------------------------------------------------------------------------|--------------|-------------|
| F3: Things “fail between the cracks” when transferring patients from one unit to another.     | 23.47        | 2.92 (0.8)  |
| F5: Important patient care information is often lost during shift changes.                    | 58.16        | 3.51(0.76)  |
| F7: Problems often occur in the exchange of information across hospital units.                | 41.24        | 3.34 (0.70) |
| F11: Shift changes are problematic for patients in this hospital.                             | 66.67        | 3.75 (0.68) |
| <b>Nonpunitive response to errors</b>                                                         | <b>78.73</b> |             |
| A8: Staff feel like their mistakes are held against them.                                     | 76.84        | 3.91 (0.77) |
| A12: When an event is reported, t feels like the person is being written up, not the problem. | 79.78        | 3.97 (0.71) |
| A16: Staff worry that mistakes they make are kept in their personnel file.                    | 79.57        | 3.98 (0.82) |
